# Supplementary material
Source: PubMed Central journal article supplement (PMC6533862)
Supplement: Supplemental_material.pdf [file Supplemental_material.pdf]

# **Supplementary Material**

## **Supplementary Methods**

## **Supplementary References**

**Supplementary Table I. Distribution of the PERFORM study population by country and region**

**Supplementary Table II. Medication use before and at randomization among patients from non-Asian and Asian countries**

**Supplementary Table III. Blood pressure and lipid levels at 3, 12, and 24 months among patients from non-Asian and Asian countries**

**Supplementary Table IV. Two-year primary, secondary, and tertiary outcomes in patients receiving aspirin from non-Asian and Asian countries**

**Supplementary Table V. Two-year primary, secondary, and tertiary outcomes in patients of non-Asian and Asian ethnic origins**

**Supplementary Table VI. Baseline characteristics associated with 2-year major adverse cardiovascular events and the interaction between patients from Asian and non-Asian countries**

## Supplementary Methods

Ischemic strokes were classified into six etiologic subtypes: atherothrombotic, likely atherothrombotic, lacunar, cardioembolic, coexisting (atherothrombotic and lacunar), or unknown.<sup>1</sup>

Atherogenic dyslipidemia was defined as high-density lipoprotein cholesterol  $\leq 40$  mg/dL and triglycerides  $\geq 150$  mg/dL.<sup>2</sup> Metabolic syndrome was defined, using World Health Organization and National Cholesterol Education Program Adult Treatment Panel III criteria,<sup>3-5</sup> as  $\geq 3$  of: body mass index  $>30.0$  kg/m<sup>2</sup> for non-Asians or  $>27.5$  kg/m<sup>2</sup> for Asians,<sup>6</sup> fasting blood glucose 5.6–6.9 mmol/L (100–125 mg/dL), systolic blood pressure (BP)  $>130$  mm Hg, triglycerides  $>1.7$  mmol/L (150 mg/dL), and high-density lipoprotein cholesterol  $<1.0$  mmol/L (40 mg/dL) for men or  $<1.3$  mmol/L (50 mg/dL) for women.

## Supplementary References

1. Bousser MG, Amarenco P, Chamorro A, et al. Rationale and design of a randomized, double-blind, parallel-group study of terutroban 30 mg/day versus aspirin 100 mg/day in stroke patients: the prevention of cerebrovascular and cardiovascular events of ischemic origin with terutroban in patients with a history of ischemic stroke or transient ischemic attack (PERFORM) study. *Cerebrovasc Dis* 2009; 27: 509-518.
2. Fruchart JC, Sacks F, Hermans MP, et al. The Residual Risk Reduction Initiative: a call to action to reduce residual vascular risk in patients with dyslipidemia. *Am J Cardiol* 2008; 102: 1K-34K.
3. Alberti KG and Zimmet PZ. Definition, diagnosis and classification of diabetes mellitus and its complications. Part 1: diagnosis and classification of diabetes mellitus provisional report of a WHO consultation. *Diabet Med* 1998; 15: 539-553.
4. Expert Panel on Detection, Evaluation and and Treatment of High Blood Cholesterol in Adults. Executive Summary of The Third Report of The National Cholesterol Education Program (NCEP) Expert Panel on Detection, Evaluation, And Treatment of High Blood Cholesterol In Adults (Adult Treatment Panel III). *JAMA* 2001; 285: 2486-2497.
5. Grundy SM, Cleeman JI, Daniels SR, et al. Diagnosis and management of the metabolic syndrome: an American Heart Association/National Heart, Lung, and Blood Institute Scientific Statement. *Circulation* 2005; 112: 2735-2752.
6. WHO Expert Consultation. Appropriate body-mass index for Asian populations and its implications for policy and intervention strategies. *Lancet* 2004; 363: 157-163.

**Supplementary Table I. Distribution of the PERFORM study population by country and region**

| <b>Country</b>        | <b>Centers, n</b> | <b>Patients, n</b> |
|-----------------------|-------------------|--------------------|
| <b>Western Europe</b> |                   |                    |
| Austria               | 16                | 189                |
| Belgium               | 22                | 563                |
| Finland               | 9                 | 245                |
| France                | 56                | 796                |
| Germany               | 66                | 1480               |
| Greece                | 5                 | 29                 |
| Ireland               | 6                 | 25                 |
| Italy                 | 61                | 1098               |
| Luxembourg            | 1                 | 17                 |
| Norway                | 5                 | 99                 |
| Portugal              | 6                 | 262                |
| Spain                 | 53                | 1077               |
| Sweden                | 8                 | 128                |
| Switzerland           | 9                 | 204                |
| The Netherlands       | 19                | 467                |
| The United Kingdom    | 52                | 865                |
| Turkey                | 10                | 78                 |
| <b>Eastern Europe</b> |                   |                    |
| Bulgaria              | 10                | 467                |
| Croatia               | 6                 | 190                |
| Czech Republic        | 10                | 787                |
| Hungary               | 22                | 766                |
| Lithuania             | 6                 | 193                |
| Poland                | 24                | 384                |
| Romania               | 15                | 809                |
| Russia                | 56                | 1594               |
| Slovakia              | 14                | 533                |
| Slovenia              | 4                 | 157                |
| Ukraine               | 7                 | 213                |
| <b>North America</b>  |                   |                    |
| Canada                | 32                | 483                |
| <b>South America</b>  |                   |                    |
| Argentina             | 23                | 463                |
| Brazil                | 22                | 1021               |
| Chile                 | 11                | 165                |
| Mexico                | 12                | 119                |
| <b>Asia</b>           |                   |                    |
| China                 | 21                | 468                |
| Hong Kong             | 4                 | 224                |
| India                 | 14                | 277                |
| Malaysia              | 2                 | 61                 |
| Singapore             | 3                 | 173                |
| South Korea           | 11                | 377                |
| Taiwan                | 8                 | 255                |
| Thailand              | 8                 | 343                |
| <b>Oceania</b>        |                   |                    |
| Australia             | 24                | 494                |
| New Zealand           | 7                 | 83                 |
| <b>Africa</b>         |                   |                    |
| Morocco               | 5                 | 5                  |
| South Africa          | 10                | 130                |
| Tunisia               | 7                 | 151                |
| <b>Total</b>          | <b>802</b>        | <b>19119</b>       |

**Supplementary Table II. Medication use before and at randomization among patients from non-Asian and Asian countries**

|                                      | Before randomization    |                    | At randomization        |                    |
|--------------------------------------|-------------------------|--------------------|-------------------------|--------------------|
|                                      | Non-Asian<br>(n=16,922) | Asian<br>(n=2,178) | Non-Asian<br>(n=16,922) | Asian<br>(n=2,178) |
| ≥1 antiplatelet agent, n (%)         | 15,590 (92.1)           | 1,947 (89.4)*      | 16,922 (100.0)          | 2,178 (100.0)      |
| Aspirin                              | 14,785 (87.4)           | 1,912 (87.8)       | 8,388 (49.6)            | 1,174 (53.9)*      |
| Other antiplatelet agent             | 5,228 (30.9)            | 710 (32.6)         | 9,549 (56.4)            | 1,118 (51.3)*      |
| Aspirin and other antiplatelet agent | 3,091 (18.3)            | 444 (20.4)*        | 1,015 (6.0)             | 114 (5.2)          |
| Oral anticoagulant agent, n (%)      | 5,982 (35.3)            | 153 (7.0)*         | 1,543 (9.1)             | 12 (0.5)*          |
| ≥1 antihypertensive agent, n (%)     | 13,959 (82.5)           | 1,573 (72.2)*      | 13,636 (80.6)           | 1,392 (63.9)*      |
| 1 agent                              | 4,625 (27.3)            | 757 (34.8)*        | 5,492 (32.4)            | 842 (38.7)*        |
| 2 agents                             | 4,767 (28.2)            | 480 (22.0)         | 4,794 (28.3)            | 394 (18.1)         |
| ≥3 agents                            | 4,567 (27.0)            | 336 (15.4)         | 3,350 (19.8)            | 156 (7.2)          |
| Statin, n (%)                        | 10,177 (60.1)           | 1,463 (67.2)*      | 10,033 (59.3)           | 1,424 (65.4)*      |

\* Age- and sex-adjusted p <0.05.

**Supplementary Table III. Blood pressure and lipid levels at 3, 12, and 24 months among patients from non-Asian and Asian countries**

|                                             | 3 months                |                    | 12 months               |                    | 24 months               |                    |
|---------------------------------------------|-------------------------|--------------------|-------------------------|--------------------|-------------------------|--------------------|
|                                             | Non-Asian<br>(n=16,375) | Asian<br>(n=2,088) | Non-Asian<br>(n=15,630) | Asian<br>(n=1,993) | Non-Asian<br>(n=14,667) | Asian<br>(n=1,822) |
| Blood pressure, mm Hg, mean±SD              |                         |                    |                         |                    |                         |                    |
| Systolic                                    | 137±16                  | 138±18*            | 137±16                  | 137±18             | 136±16                  | 136±18             |
| Diastolic                                   | 81±9                    | 82±10*             | 80±9                    | 81±10*             | 80±9                    | 80±10              |
| Lipid concentrations                        |                         |                    |                         |                    |                         |                    |
| Total cholesterol, mg/dL, mean±SD           | 179±43                  | 168±39*            | 184±44                  | 176±40*            | 186±45                  | 178±40*            |
| LDL cholesterol, mg/dL, mean±SD             | 105±37                  | 99±32*             | 106±38                  | 102±33*            | 107±38                  | 105±34*            |
| HDL cholesterol, mg/dL, mean±SD             | 52±14                   | 48±12*             | 52±15                   | 49±13*             | 51±14                   | 48±13*             |
| Triglycerides, mg/dL, † median (IQR)        | 118 (88–163)            | 127 (97–172)*      | 120 (88–165)            | 127 (95–173)*      | 119 (88–166)            | 124 (93–168)       |
| HDL ≤40 and triglycerides ≥150 mg/dL, n (%) | 1,556 (9.2)             | 271 (12.4)*        | 1,805 (10.7)            | 282 (12.9)         | 1,793 (10.6)            | 257 (11.8)         |
| HDL ≤35 and triglycerides ≥200 mg/dL, n (%) | 458 (2.7)               | 84 (3.9)*          | 554 (3.3)               | 95 (4.4)*          | 583 (3.4)               | 65 (3.0)           |

Abbreviations: HDL, high-density lipoprotein; IQR, interquartile range; LDL, low-density lipoprotein; SD, standard deviation.

\* Age- and sex-adjusted p <0.05.

† Analyzed using logarithmic values.

**Supplementary Table IV. Two-year primary, secondary, and tertiary outcomes in patients receiving aspirin from non-Asian and Asian countries**

|                                | Events, n (%) <sup>*</sup> |                    | Adjusted <sup>*</sup> HR<br>(95% CI) | p-value <sup>*</sup> | Fully-adjusted <sup>†</sup> HR<br>(95% CI) | p-value <sup>†</sup> |
|--------------------------------|----------------------------|--------------------|--------------------------------------|----------------------|--------------------------------------------|----------------------|
|                                | Non-Asian<br>(n=8,388)     | Asian<br>(n=1,174) |                                      |                      |                                            |                      |
| Primary outcome                |                            |                    |                                      |                      |                                            |                      |
| MACE                           | 844 (10.3)                 | 107 (9.8)          | 0.95 (0.77-1.16)                     | 0.60                 | 0.90 (0.73-1.10)                           | 0.31                 |
| Nonfatal myocardial infarction | 105 (1.3)                  | 7 (0.7)            | 0.50 (0.23-1.07)                     | 0.07                 | 0.49 (0.22-1.07)                           | 0.07                 |
| Nonfatal stroke                | 617 (7.6)                  | 87 (7.9)           | 1.05 (0.83-1.31)                     | 0.69                 | 1.02 (0.81-1.27)                           | 0.89                 |
| Cardiovascular death           | 150 (1.9)                  | 18 (1.8)           | 0.95 (0.58-1.55)                     | 0.83                 | 0.82 (0.50-1.34)                           | 0.42                 |
| Secondary outcomes             |                            |                    |                                      |                      |                                            |                      |
| All-cause death                | 401 (4.9)                  | 49 (4.6)           | 0.94 (0.70-1.27)                     | 0.70                 | 0.87 (0.64-1.18)                           | 0.37                 |
| Myocardial infarction          | 109 (1.4)                  | 8 (0.7)            | 0.55 (0.26-1.13)                     | 0.10                 | 0.53 (0.25-1.10)                           | 0.09                 |
| Stroke                         | 623 (7.6)                  | 87 (7.9)           | 1.04 (0.82-1.30)                     | 0.75                 | 1.01 (0.80-1.27)                           | 0.94                 |
| Intracranial hemorrhage        | 89 (1.2)                   | 19 (1.9)           | 1.55 (0.95-2.55)                     | 0.08                 | 1.52 (0.91-2.51)                           | 0.10                 |
| Bleeding                       | 1220 (16.2)                | 172 (16.4)         | 1.02 (0.86-1.20)                     | 0.85                 | 1.02 (0.86-1.20)                           | 0.82                 |
| Minor bleeding                 | 984 (13.1)                 | 132 (12.6)         | 0.96 (0.80-1.16)                     | 0.67                 | 0.96 (0.80-1.16)                           | 0.68                 |
| Major bleeding                 | 303 (4.2)                  | 50 (5.1)           | 1.22 (0.91-1.65)                     | 0.19                 | 1.22 (0.90-1.65)                           | 0.20                 |
| Tertiary outcomes              |                            |                    |                                      |                      |                                            |                      |
| New-onset atrial fibrillation  | 147 (1.9)                  | 14 (1.4)           | 0.75 (0.43-1.30)                     | 0.30                 | 0.82 (0.47-1.42)                           | 0.48                 |
| MACE <sup>‡</sup>              | 24 (16.9)                  | 1 (7.3)            | 0.41 (0.05-3.06)                     | 0.38                 | 0.37 (0.04-2.90)                           | 0.35                 |

Abbreviations: CI, confidence interval; HR, hazard ratio; MACE, major adverse cardiovascular events.

<sup>\*</sup> Adjusted for age and sex.

<sup>†</sup> Adjusted for age, sex, modified Rankin Scale, hypertension, statin use.

<sup>‡</sup> Calculated for patients with new onset atrial fibrillation.

**Supplementary Table V. Two-year primary, secondary, and tertiary outcomes in patients of non-Asian and Asian ethnic origins**

|                                | Events, n (%) <sup>*</sup> |                    | Adjusted <sup>*</sup> HR<br>(95% CI) | p-value <sup>*</sup> | Fully-adjusted <sup>†</sup> HR<br>(95% CI) | p-value <sup>†</sup> |
|--------------------------------|----------------------------|--------------------|--------------------------------------|----------------------|--------------------------------------------|----------------------|
|                                | Non-Asian<br>(n=16,856)    | Asian<br>(n=2,244) |                                      |                      |                                            |                      |
| Primary outcome                |                            |                    |                                      |                      |                                            |                      |
| MACE                           | 1,731 (10.6)               | 233 (11.3)         | 1.08 (0.94-1.24)                     | 0.29                 | 1.04 (0.90-1.19)                           | 0.59                 |
| Nonfatal myocardial infarction | 213 (1.3)                  | 17 (0.9)           | 0.65 (0.39-1.07)                     | 0.09                 | 0.65 (0.39-1.07)                           | 0.09                 |
| Nonfatal stroke                | 1,281 (7.8)                | 181 (8.7)          | 1.12 (0.95-1.30)                     | 0.17                 | 1.10 (0.93-1.29)                           | 0.25                 |
| Cardiovascular death           | 301 (1.8)                  | 43 (2.3)           | 1.23 (0.89-1.69)                     | 0.21                 | 1.08 (0.78-1.50)                           | 0.64                 |
| Secondary outcomes             |                            |                    |                                      |                      |                                            |                      |
| All-cause death                | 817 (4.9)                  | 105 (5.3)          | 1.08 (0.88-1.33)                     | 0.46                 | 0.99 (0.80-1.22)                           | 0.89                 |
| Myocardial infarction          | 220 (1.4)                  | 18 (0.9)           | 0.66 (0.41-1.08)                     | 0.10                 | 0.66 (0.40-1.06)                           | 0.09                 |
| Stroke                         | 1,290 (7.9)                | 184 (8.8)          | 1.13 (0.96-1.32)                     | 0.13                 | 1.11 (0.94-1.30)                           | 0.20                 |
| Intracranial hemorrhage        | 191 (1.3)                  | 46 (2.4)           | 1.88 (1.36-2.60)                     | <0.001               | 1.87 (1.34-2.59)                           | <0.001               |
| Bleeding                       | 2,224 (14.6)               | 318 (16.3)         | 1.13 (1.00-1.27)                     | 0.05                 | 1.11 (0.98-1.25)                           | 0.09                 |
| Minor bleeding                 | 1,745 (11.5)               | 232 (12.0)         | 1.04 (0.91-1.20)                     | 0.55                 | 1.03 (0.89-1.18)                           | 0.72                 |
| Major bleeding                 | 600 (4.1)                  | 104 (5.9)          | 1.39 (1.12-1.71)                     | 0.002                | 1.35 (1.09-1.68)                           | 0.005                |
| Tertiary outcomes              |                            |                    |                                      |                      |                                            |                      |
| New-onset atrial fibrillation  | 390 (2.4)                  | 36 (1.9)           | 0.78 (0.55-1.10)                     | 0.15                 | 0.86 (0.61-1.22)                           | 0.39                 |
| MACE <sup>‡</sup>              | 70 (18.7)                  | 7 (19.6)           | 1.06 (0.48-2.32)                     | 0.89                 | 1.13 (0.50-2.46)                           | 0.79                 |

Abbreviations: CI, confidence interval; HR, hazard ratio; MACE, major adverse cardiovascular events.

<sup>\*</sup> Adjusted for age and sex.

<sup>†</sup> Adjusted for age, sex, modified Rankin Scale, hypertension, statin use, and antiplatelet treatment allocation (aspirin or terutroban).

<sup>‡</sup> Calculated for patients with new onset atrial fibrillation.

**Supplementary Table VI. Baseline characteristics associated with 2-year major adverse cardiovascular events and the interaction between patients from Asian and non-Asian countries**

|                                                   | Non-Asian             |          | Asian                 |          |          |
|---------------------------------------------------|-----------------------|----------|-----------------------|----------|----------|
|                                                   | Adjusted* HR (95% CI) | p-value* | Adjusted* HR (95% CI) | p-value* | p-value† |
| <b>Demographics</b>                               |                       |          |                       |          |          |
| Age, per 10 years                                 | 1.03 (1.03–1.04)      | <0.001   | 1.33 (1.12–1.58)      | 0.001    | 0.61     |
| Male                                              | 1.35 (1.22–1.50)      | <0.001   | 1.41 (1.06–1.87)      | 0.02     | 0.74     |
| <b>Medical history</b>                            |                       |          |                       |          |          |
| Hypertension                                      | 1.20 (1.05–1.38)      | 0.009    | 1.04 (0.75–1.45)      | 0.81     | 0.42     |
| Diabetes                                          | 1.40 (1.27–1.55)      | <0.001   | 1.06 (0.81–1.39)      | 0.67     | 0.06     |
| Former smoking                                    | 0.99 (0.89–1.10)      | 0.85     | 1.02 (0.71–1.44)      | 0.93     | 0.87     |
| Current smoking                                   | 1.13 (1.01–1.27)      | 0.03     | 1.10 (0.81–1.49)      | 0.53     | 0.98     |
| Stroke, TIA                                       | 1.54 (1.38–1.70)      | <0.001   | 1.63 (1.23–2.17)      | <0.001   | 0.71     |
| Coronary artery disease                           | 1.78 (1.61–1.96)      | <0.001   | 1.31 (0.90–1.89)      | 0.16     | 0.11     |
| Peripheral artery disease                         | 1.73 (1.44–2.07)      | <0.001   | 3.34 (0.83–13.46)     | 0.09     | 0.35     |
| Atrial fibrillation or flutter                    | 2.06 (1.71–2.48)      | <0.001   | 1.73 (0.81–3.69)      | 0.16     | 0.61     |
| Congestive heart failure                          | 1.83 (1.55–2.16)      | <0.001   | 1.07 (0.27–4.32)      | 0.92     | 0.44     |
| <b>Educational level</b>                          |                       |          |                       |          |          |
| 0–4 years                                         | 1.00 (ref)            | 0.02     | 1.00 (ref)            | 0.98     | –        |
| 5–8 years                                         | 0.85 (0.73–0.98)      |          | 0.97 (0.68–1.38)      |          | 0.42     |
| 9–13 years or high school diploma                 | 0.91 (0.78–1.05)      |          | 1.01 (0.70–1.46)      |          | 0.44     |
| College experience or higher degree               | 0.79 (0.67–0.94)      |          | 0.93 (0.59–1.47)      |          | 0.41     |
| <b>Examinations</b>                               |                       |          |                       |          |          |
| Body mass index, per 1 kg/m <sup>2</sup> increase | 1.00 (0.99–1.01)      | 0.90     | 0.97 (0.93–1.01)      | 0.15     | 0.20     |
| Systolic BP, per 5 mm Hg increase                 | 1.01 (1.01–1.03)      | 0.03     | 1.01 (0.98–1.05)      | 0.43     | 0.92     |
| Diastolic BP, per 5 mm Hg increase                | 1.01 (0.98–1.03)      | 0.50     | 1.08 (1.01–1.13)      | 0.03     | 0.06     |
| Atherogenic dyslipidemia                          | 1.16 (1.01–1.33)      | 0.03     | 0.76 (0.51–1.13)      | 0.17     | 0.05     |
| Metabolic syndrome                                | 1.13 (1.02–1.26)      | 0.02     | 0.95 (0.71–1.28)      | 0.75     | 0.26     |
| <b>Modified Rankin Scale</b>                      |                       |          |                       |          |          |
| 0 (no symptoms)                                   | 1.00 (ref)            | <0.001   | 1.00 (ref)            | 0.001    | –        |
| 1 (no significant disability)                     | 1.26 (1.09–1.44)      |          | 1.39 (0.81–2.38)      |          | 0.71     |
| 2 (slight disability)                             | 1.73 (1.50–2.00)      |          | 1.79 (1.02–3.15)      |          | 0.89     |
| 3 (moderate disability)                           | 1.58 (1.32–1.88)      |          | 1.94 (1.08–3.49)      |          | 0.52     |
| 4 (moderately severe disability)                  | 1.77 (1.44–2.18)      |          | 2.76 (1.54–4.92)      |          | 0.18     |

Abbreviations: BP, blood pressure; CI, confidence interval; HR, hazard ratio; TIA, transient ischemic attack.

\* Adjusted for age and sex.

† p for interaction between patients from Asian and non-Asian countries.
